# Supplementary material for: How Microbiome Composition Correlates with Biochemical Changes during Sauerkraut Fermentation: a Focus on Neglected Bacterial Players and Functionalities
Source: PubMed Central journal article supplement (PMC9430578; doi:10.1128/spectrum.00168-22), 2022-06-14
Supplement: spectrum.00168-22-s0001.pdf [file spectrum.00168-22-s0001.pdf]

**Table S1.** Numbers of genes associated to carbohydrates metabolism for each species identified during spontaneous fermentation of sauerkraut carried out at 15 °C for 42 days. Samples were taken at the beginning of fermentation (D0), after 0.5 (D0.5), 1 (D1), 2 (D2), 3 (D3), 4 (D4), 5 (D5), 7 (D7), 14 (D14), 21 (D21), 28 (D28), 35 (D35), and 42 (D42) days of fermentation.

| <b>Carbohydrate metabolism</b>             | <b>D0</b> | <b>D0.5</b> | <b>D1</b> | <b>2D</b> | <b>3D</b> | <b>4D</b> | <b>5D</b> | <b>7D</b> | <b>14D</b> | <b>21D</b> | <b>28D</b> | <b>35D</b> | <b>42D</b> |
|--------------------------------------------|-----------|-------------|-----------|-----------|-----------|-----------|-----------|-----------|------------|------------|------------|------------|------------|
| <i>Lactococcus lactis</i>                  | 253       | 253         | 253       | 253       | 253       | 253       | 16        | 16        | 44         | 16         | 16         | 33         | 0          |
| <i>Leuconostoc carnosum</i>                | 194       | 170         | 150       | 194       | 194       | 194       | 32        | 27        | 27         | 27         | 27         | 25         | 27         |
| <i>Leuconostoc citreum</i>                 | 163       | 85          | 186       | 192       | 197       | 194       | 194       | 194       | 194        | 192        | 194        | 191        | 194        |
| <i>Weissella koreensis</i>                 | 137       | 137         | 61        | 137       | 137       | 137       | 6         | 0         | 6          | 6          | 6          | 6          | 6          |
| <i>Secundilactobacillus malefermentans</i> | 83        | 49          | 50        | 62        | 153       | 153       | 158       | 158       | 159        | 158        | 158        | 153        | 158        |
| <i>Pediococcus parvulus</i>                | 40        | 44          | 33        | 25        | 52        | 45        | 54        | 53        | 53         | 54         | 54         | 54         | 54         |
| <i>Lactococcus piscium</i>                 | 34        | 34          | 11        | 189       | 238       | 238       | 0         | 0         | 0          | 0          | 0          | 0          | 0          |
| <i>Enterobacter sp. OV724</i>              | 15        | 15          | 15        | 14        | 0         | 15        | 0         | 0         | 0          | 0          | 0          | 0          | 0          |
| <i>Latilactobacillus sakei</i>             | 15        | 0           | 0         | 14        | 169       | 167       | 138       | 173       | 8          | 9          | 12         | 11         | 8          |
| <i>Spermatophyta</i>                       | 5         | 5           | 5         | 5         | 5         | 5         | 5         | 5         | 5          | 5          | 5          | 5          | 5          |
| <i>Rahnella sp. NFIX50</i>                 | 2         | 2           | 2         | 2         | 2         | 2         | 0         | 0         | 0          | 0          | 0          | 0          | 0          |
| <i>Weissella cibaria</i>                   | 2         | 2           | 2         | 2         | 2         | 28        | 1         | 0         | 1          | 1          | 1          | 1          | 1          |
| <i>Leclercia sp. W6</i>                    | 1         | 1           | 1         | 1         | 0         | 1         | 0         | 0         | 0          | 0          | 0          | 0          | 0          |
| <i>Pantoea agglomerans*</i>                | 1         | 1           | 1         | 1         | 0         | 0         | 0         | 0         | 0          | 0          | 0          | 0          | 0          |
| <i>Rahnella sp. NRRL B-41462</i>           | 1         | 1           | 1         | 1         | 1         | 1         | 0         | 0         | 0          | 0          | 0          | 0          | 0          |
| <i>Levilactobacillus brevis</i>            | 0         | 0           | 0         | 0         | 2         | 2         | 2         | 2         | 2          | 2          | 2          | 2          | 2          |
| <i>Latilactobacillus curvatus</i>          | 0         | 0           | 0         | 0         | 0         | 0         | 1         | 0         | 0          | 0          | 1          | 0          | 0          |
| <i>Companilactobacillus futsaii</i>        | 0         | 0           | 0         | 0         | 0         | 0         | 1         | 0         | 1          | 0          | 1          | 1          | 0          |
| <i>Lentilactobacillus parafarraginis</i>   | 0         | 0           | 0         | 0         | 0         | 0         | 0         | 0         | 2          | 0          | 0          | 0          | 0          |

|                                      |     |     |     |      |      |      |     |     |     |     |     |     |     |
|--------------------------------------|-----|-----|-----|------|------|------|-----|-----|-----|-----|-----|-----|-----|
| <i>Lactiplantibacillus plantarum</i> | 0   | 0   | 0   | 0    | 6    | 6    | 6   | 6   | 6   | 6   | 6   | 6   | 6   |
| <i>Secundilactobacillus silagei</i>  | 0   | 0   | 0   | 0    | 19   | 1    | 27  | 18  | 18  | 27  | 26  | 27  | 23  |
| <i>Leuconostoc gelidum</i>           | 0   | 1   | 0   | 1    | 65   | 2    | 0   | 1   | 0   | 0   | 0   | 0   | 0   |
| <i>Leuconostoc mesenteroides</i>     | 0   | 0   | 0   | 4    | 9    | 4    | 1   | 1   | 1   | 1   | 1   | 1   | 1   |
| <i>Leuconostocaceae bacterium</i>    | 0   | 0   | 3   | 0    | 3    | 3    | 3   | 3   | 3   | 0   | 3   | 3   | 3   |
| <i>Pediococcus cellicola</i>         | 0   | 0   | 0   | 0    | 4    | 0    | 4   | 4   | 4   | 4   | 4   | 4   | 4   |
| <i>Pediococcus damnosus</i>          | 0   | 0   | 0   | 0    | 3    | 0    | 3   | 3   | 3   | 3   | 3   | 3   | 3   |
| <i>Pediococcus ethanolidurans</i>    | 0   | 0   | 0   | 0    | 10   | 0    | 10  | 10  | 12  | 12  | 12  | 12  | 10  |
| <i>unclassified Lactobacillus</i>    | 0   | 0   | 0   | 0    | 3    | 0    | 3   | 4   | 4   | 4   | 4   | 3   | 4   |
| <i>Weissella confusa</i>             | 0   | 0   | 0   | 0    | 1    | 0    | 0   | 0   | 0   | 0   | 1   | 0   | 0   |
| <i>Weissella kandleri</i>            | 0   | 1   | 0   | 1    | 1    | 1    | 0   | 0   | 0   | 0   | 0   | 0   | 0   |
| <i>Weissella paramesenteroides</i>   | 0   | 0   | 0   | 0    | 2    | 2    | 0   | 0   | 0   | 0   | 0   | 0   | 0   |
| <b>Total</b>                         | 946 | 801 | 774 | 1098 | 1531 | 1454 | 665 | 678 | 553 | 527 | 537 | 541 | 509 |

**Table S2.** Binning parameters of the 9 high quality genomes MAGs (Metagenome-Assembled-Genomes) after binning and *de-novo* reassembly of all the metagenome sequences from sauerkraut samples collected at the beginning of fermentation (D0), after 0.5 (D0.5), 1 (D1), 2 (D2), 3 (D3), 4 (D4), 5 (D5), 7 (D7), 14 (D14), 21 (D21), 28 (D28), 35 (D35), and 42 (D42) days of fermentation.

| MA<br>G<br>ID  | MAG<br>name                               | Compl<br>eteness | Conta<br>minatio<br>n | Strain<br>hetero<br>geneity | MA<br>G<br>size<br>(Mb<br>p) | 0D           | 0.5D         | 1D           | 2D           | 3D           | 4D           | 5D           | 7D           | 14D          | 21D          | 28D          | 35D          | 42D          |
|----------------|-------------------------------------------|------------------|-----------------------|-----------------------------|------------------------------|--------------|--------------|--------------|--------------|--------------|--------------|--------------|--------------|--------------|--------------|--------------|--------------|--------------|
| MA<br>G_2<br>2 | <i>Pediococcus parvulus</i><br>MAG_22     | 97.22            | 0.87                  | 60                          | 1.93<br>3514                 | 0.00<br>9938 | 0.01<br>1321 | 0.00<br>2125 | 0.00<br>1582 | 0.42<br>1514 | 0.01<br>677  | 4.48<br>4935 | 38.0<br>6915 | 53.1<br>5972 | 84.5<br>3077 | 62.1<br>168  | 91.8<br>7508 | 56.4<br>8383 |
| MA<br>G_2<br>3 | <i>Lactococcus lactis</i><br>MAG_23       | 90.91            | 0.88                  | 33.33                       | 2.08<br>6278                 | 0.40<br>896  | 0.68<br>8253 | 0.20<br>813  | 0.26<br>2873 | 0.34<br>0631 | 0.00<br>3504 | 0<br>0       | 0<br>0       | 7.13<br>E-06 | 0<br>0       | 0<br>0       | 2.44<br>E-05 | 1.04<br>E-05 |
| MA<br>G_4<br>3 | <i>Weissella confusa</i><br>MAG_43        | 89.26            | 0.31                  | 100                         | 1.95<br>0252                 | 0.00<br>5422 | 0.00<br>0823 | 0.00<br>0207 | 0.00<br>0206 | 15.0<br>8355 | 6.20<br>135  | 0.00<br>1319 | 0.00<br>2259 | 0.00<br>3172 | 0.00<br>3893 | 0.00<br>3399 | 0.00<br>5441 | 0.00<br>2523 |
| MA<br>G_2<br>9 | <i>Erwinia persicina</i><br>MAG_29        | 87.24            | 0.38                  | 16.67                       | 4.27<br>3701                 | 0.00<br>2672 | 0.00<br>4671 | 0.00<br>3311 | 0.00<br>3628 | 0.50<br>6218 | 0.14<br>9372 | 0.50<br>9917 | 0.06<br>5694 | 0.00<br>8023 | 0.00<br>0782 | 0.00<br>0425 | 0.00<br>1737 | 0.00<br>0797 |
| MA<br>G_3<br>6 | <i>Leuconostoc sp.</i><br>MAG_36          | 85.64            | 8.25                  | 32.43                       | 2.68<br>753                  | 0.00<br>1079 | 0.00<br>0295 | 6.53<br>E-05 | 5.39<br>E-05 | 0.52<br>3913 | 0.57<br>8245 | 0.00<br>0361 | 0.00<br>0257 | 0.00<br>0155 | 0<br>0       | 0.00<br>0222 | 0<br>0       | 1.61<br>E-05 |
| MA<br>G_2<br>7 | <i>Lactococcus piscium_C</i><br>MAG_27    | 85.51            | 4.81                  | 70                          | 2.42<br>7631                 | 0.00<br>0763 | 0.00<br>022  | 5.06<br>E-05 | 0.01<br>918  | 0.47<br>7859 | 0.54<br>2194 | 0<br>0       | 0<br>0       | 0<br>0       | 0<br>0       | 0<br>0       | 0<br>0       | 0<br>0       |
| MA<br>G_1<br>8 | <i>Raoultella terrigena</i><br>MAG_18     | 75.16            | 5.26                  | 100                         | 4.99<br>0814                 | 19.6<br>5899 | 19.2<br>3193 | 19.9<br>8495 | 20.7<br>1456 | 0.04<br>0932 | 0.23<br>0133 | 0.00<br>4003 | 0.00<br>2811 | 0.00<br>21   | 1.85<br>E-05 | 5.2E<br>-06  | 1.7E<br>-05  | 4.33<br>E-06 |
| MA<br>G_9      | <i>Leuconostoc mesenteroides</i><br>MAG_9 | 68.42            | 0                     | 0                           | 1.13<br>4091                 | 0.00<br>0798 | 0.00<br>0302 | 0.00<br>0279 | 0.06<br>7051 | 2.56<br>1295 | 0.01<br>1401 | 1.41<br>317  | 0.05<br>1756 | 0.33<br>3348 | 1.19<br>3912 | 6.96<br>2449 | 0.64<br>9091 | 8.71<br>2914 |



**Table S3.** Numbers of genes associated to lipid metabolism for each species identified during spontaneous fermentation of sauerkraut carried out at 15 °C for 42 days. Samples were taken at the beginning of fermentation (D0), after 0.5 (D0.5), 1 (D1), 2 (D2), 3 (D3), 4 (D4), 5 (D5), 7 (D7), 14 (D14), 21 (D21), 28 (D28), 35 (D35), and 42 (D42) days of fermentation.

| <b>Lipid metabolism</b>                    | <b>0D</b> | <b>0.5D</b> | <b>1D</b> | <b>2D</b> | <b>3D</b> | <b>4D</b> | <b>5D</b> | <b>7D</b> | <b>14D</b> | <b>21D</b> | <b>28D</b> | <b>35D</b> | <b>42D</b> |
|--------------------------------------------|-----------|-------------|-----------|-----------|-----------|-----------|-----------|-----------|------------|------------|------------|------------|------------|
| <i>Lactococcus lactis</i>                  | 253       | 253         | 253       | 253       | 253       | 253       | 16        | 16        | 44         | 16         | 16         | 33         | 0          |
| <i>Leuconostoc carnosum</i>                | 194       | 170         | 150       | 194       | 194       | 194       | 32        | 27        | 27         | 27         | 27         | 25         | 27         |
| <i>Leuconostoc citreum</i>                 | 163       | 85          | 186       | 192       | 197       | 194       | 194       | 194       | 194        | 192        | 194        | 191        | 194        |
| <i>Weissella koreensis</i>                 | 137       | 137         | 61        | 137       | 137       | 137       | 6         | 0         | 6          | 6          | 6          | 6          | 6          |
| <i>Secundilactobacillus malefermentans</i> | 83        | 49          | 50        | 62        | 153       | 153       | 158       | 158       | 159        | 158        | 158        | 153        | 158        |
| <i>Pediococcus parvulus</i>                | 40        | 44          | 33        | 25        | 52        | 45        | 54        | 53        | 53         | 54         | 54         | 54         | 54         |
| <i>Lactococcus piscium</i>                 | 34        | 34          | 11        | 189       | 238       | 238       | 0         | 0         | 0          | 0          | 0          | 0          | 0          |
| <i>Enterobacter sp. OV724</i>              | 15        | 15          | 15        | 14        | 0         | 15        | 0         | 0         | 0          | 0          | 0          | 0          | 0          |
| <i>Latilactobacillus sakei</i>             | 15        | 0           | 0         | 14        | 169       | 167       | 138       | 173       | 8          | 9          | 12         | 11         | 8          |
| <i>Spermatophyta</i>                       | 5         | 5           | 5         | 5         | 5         | 5         | 5         | 5         | 5          | 5          | 5          | 5          | 5          |
| <i>Rahnella sp. NFIX50</i>                 | 2         | 2           | 2         | 2         | 2         | 2         | 0         | 0         | 0          | 0          | 0          | 0          | 0          |
| <i>Weissella cibaria</i>                   | 2         | 2           | 2         | 2         | 2         | 28        | 1         | 0         | 1          | 1          | 1          | 1          | 1          |
| <i>Leclercia sp. W6</i>                    | 1         | 1           | 1         | 1         | 0         | 1         | 0         | 0         | 0          | 0          | 0          | 0          | 0          |
| <i>Pantoea agglomerans</i>                 | 1         | 1           | 1         | 1         | 0         | 0         | 0         | 0         | 0          | 0          | 0          | 0          | 0          |
| <i>Rahnella sp. NRRL B-41462</i>           | 1         | 1           | 1         | 1         | 1         | 1         | 0         | 0         | 0          | 0          | 0          | 0          | 0          |
| <i>Levilactobacillus brevis</i>            | 0         | 0           | 0         | 0         | 2         | 2         | 2         | 2         | 2          | 2          | 2          | 2          | 2          |
| <i>Latilactobacillus curvatus</i>          | 0         | 0           | 0         | 0         | 0         | 0         | 1         | 0         | 0          | 0          | 1          | 0          | 0          |
| <i>Companilactobacillus futsaii</i>        | 0         | 0           | 0         | 0         | 0         | 0         | 1         | 0         | 1          | 0          | 1          | 1          | 0          |
| <i>Lentilactobacillus parafarraginis</i>   | 0         | 0           | 0         | 0         | 0         | 0         | 0         | 0         | 2          | 0          | 0          | 0          | 0          |

|                                      |     |     |     |      |      |      |     |     |     |     |     |     |     |
|--------------------------------------|-----|-----|-----|------|------|------|-----|-----|-----|-----|-----|-----|-----|
| <i>Lactiplantibacillus plantarum</i> | 0   | 0   | 0   | 0    | 6    | 6    | 6   | 6   | 6   | 6   | 6   | 6   | 6   |
| <i>Secundilactobacillus silagei</i>  | 0   | 0   | 0   | 0    | 19   | 1    | 27  | 18  | 18  | 27  | 26  | 27  | 23  |
| <i>Leuconostoc gelidum</i>           | 0   | 1   | 0   | 1    | 65   | 2    | 0   | 1   | 0   | 0   | 0   | 0   | 0   |
| <i>Leuconostoc mesenteroides</i>     | 0   | 0   | 0   | 4    | 9    | 4    | 1   | 1   | 1   | 1   | 1   | 1   | 1   |
| <i>Leuconostocaceae bacterium</i>    | 0   | 0   | 3   | 0    | 3    | 3    | 3   | 3   | 3   | 0   | 3   | 3   | 3   |
| <i>Pediococcus cellicola</i>         | 0   | 0   | 0   | 0    | 4    | 0    | 4   | 4   | 4   | 4   | 4   | 4   | 4   |
| <i>Pediococcus damnosus</i>          | 0   | 0   | 0   | 0    | 3    | 0    | 3   | 3   | 3   | 3   | 3   | 3   | 3   |
| <i>Pediococcus ethanolidurans</i>    | 0   | 0   | 0   | 0    | 10   | 0    | 10  | 10  | 12  | 12  | 12  | 12  | 10  |
| <i>unclassified Lactobacillus</i>    | 0   | 0   | 0   | 0    | 3    | 0    | 3   | 4   | 4   | 4   | 4   | 3   | 4   |
| <i>Weissella confusa</i>             | 0   | 0   | 0   | 0    | 1    | 0    | 0   | 0   | 0   | 0   | 1   | 0   | 0   |
| <i>Weissella kandleri</i>            | 0   | 1   | 0   | 1    | 1    | 1    | 0   | 0   | 0   | 0   | 0   | 0   | 0   |
| <i>Weissella paramesenteroides</i>   | 0   | 0   | 0   | 0    | 2    | 2    | 0   | 0   | 0   | 0   | 0   | 0   | 0   |
| <b>Total</b>                         | 946 | 801 | 774 | 1098 | 1531 | 1454 | 665 | 678 | 553 | 527 | 537 | 541 | 509 |

**Table S4.** P values corrected by False Discovery Rate (FDR) of the correlations between the top 15 bacterial species present at the beginning of fermentation (from D0 to D7) and time of fermentation (days), physico-chemical and biochemical composition, and phenolic compounds at the same interval of time.

|                            | <i>Lactococcus piscium</i> | <i>Weissella oryzae</i> | <i>Weissella</i> sp. 8H-2 | <i>Enterobacter</i> sp. 638 | <i>Enterobacter</i> sp. OV724 | <i>Rahnella</i> sp. NFIX50 | <i>Enterobacter cloacae</i> complex | <i>Enterobacter</i> sp. FS01 | <i>Weissella kandleri</i> | <i>Leuconostoc pseudomesenteroides</i> | <i>Carnobacterium divergens</i> | <i>Rahnella</i> sp. ERM1:05 | <i>Vagococcus entomophilus</i> | <i>Leuconostoc</i> sp. C2 | <i>Campylobacter jejuni</i> |
|----------------------------|----------------------------|-------------------------|---------------------------|-----------------------------|-------------------------------|----------------------------|-------------------------------------|------------------------------|---------------------------|----------------------------------------|---------------------------------|-----------------------------|--------------------------------|---------------------------|-----------------------------|
| <b>Time (Days)</b>         | 0.023                      | 0.216                   | 0.667                     | 0.014                       | 0.033                         | 0.002                      | 0.002                               | 0.023                        | 0.249                     | 0.481                                  | 0.163                           | 0.002                       | 0.475                          | 0.667                     | 0.001                       |
| <b>pH</b>                  | 0.029                      | 0.249                   | 0.667                     | 0.011                       | 0.026                         | 0.002                      | 0.001                               | 0.019                        | 0.282                     | 0.481                                  | 0.240                           | 0.002                       | 0.475                          | 0.667                     | 0.002                       |
| <b>TTA</b>                 | 0.023                      | 0.216                   | 0.667                     | 0.014                       | 0.033                         | 0.002                      | 0.002                               | 0.023                        | 0.249                     | 0.481                                  | 0.163                           | 0.002                       | 0.475                          | 0.667                     | 0.001                       |
| <b>Citric acid</b>         | 0.029                      | 0.117                   | 0.249                     | 0.041                       | 0.074                         | 0.113                      | 0.087                               | 0.051                        | 0.083                     | 0.215                                  | 0.288                           | 0.113                       | 0.249                          | 0.249                     | 0.058                       |
| <b>Lactic acid</b>         | 0.024                      | 0.249                   | 0.667                     | 0.015                       | 0.035                         | 0.002                      | 0.002                               | 0.022                        | 0.214                     | 0.481                                  | 0.174                           | 0.002                       | 0.475                          | 0.667                     | 0.001                       |
| <b>Acetic acid</b>         | 0.255                      | 0.678                   | 0.958                     | 0.249                       | 0.375                         | 0.044                      | 0.041                               | 0.278                        | 0.667                     | 0.941                                  | 0.651                           | 0.044                       | 0.973                          | 0.958                     | 0.020                       |
| <b>Fructose</b>            | 0.022                      | 0.214                   | 0.678                     | 0.009                       | 0.018                         | 0.002                      | 0.002                               | 0.012                        | 0.249                     | 0.475                                  | 0.237                           | 0.002                       | 0.481                          | 0.678                     | 0.001                       |
| <b>Glucose</b>             | 0.037                      | 0.255                   | 0.799                     | 0.013                       | 0.018                         | 0.005                      | 0.002                               | 0.012                        | 0.319                     | 0.568                                  | 0.285                           | 0.005                       | 0.599                          | 0.799                     | 0.002                       |
| <b>Mannitol</b>            | 0.036                      | 0.254                   | 0.760                     | 0.018                       | 0.037                         | 0.002                      | 0.002                               | 0.037                        | 0.248                     | 0.475                                  | 0.568                           | 0.002                       | 0.448                          | 0.760                     | 0.002                       |
| <b>Chlorogenic acid</b>    | 0.021                      | 0.037                   | 0.215                     | 0.033                       | 0.123                         | 0.022                      | 0.035                               | 0.234                        | 0.123                     | 0.077                                  | 0.565                           | 0.022                       | 0.062                          | 0.215                     | 0.058                       |
| <b>Caffeic acid</b>        | 0.975                      | 0.973                   | 0.568                     | 0.534                       | 0.327                         | 0.646                      | 0.448                               | 0.350                        | 0.389                     | 0.694                                  | 0.249                           | 0.646                       | 0.618                          | 0.568                     | 0.726                       |
| <b>p-coumaric acid</b>     | 0.140                      | 0.333                   | 0.808                     | 0.039                       | 0.037                         | 0.047                      | 0.024                               | 0.037                        | 0.668                     | 0.626                                  | 0.808                           | 0.047                       | 0.667                          | 0.808                     | 0.060                       |
| <b>Vanillin</b>            | 0.300                      | 0.797                   | 0.853                     | 0.264                       | 0.389                         | 0.037                      | 0.075                               | 0.380                        | 0.394                     | 0.872                                  | 0.916                           | 0.037                       | 0.749                          | 0.853                     | 0.047                       |
| <b>Ferulic acid</b>        | 0.448                      | 0.817                   | 0.958                     | 0.221                       | 0.153                         | 0.319                      | 0.179                               | 0.069                        | 0.974                     | 0.990                                  | 0.665                           | 0.319                       | 0.906                          | 0.958                     | 0.271                       |
| <b>Sinapic acid</b>        | 0.988                      | 0.878                   | 0.694                     | 0.668                       | 0.434                         | 0.932                      | 0.608                               | 0.271                        | 0.389                     | 0.488                                  | 0.973                           | 0.932                       | 0.375                          | 0.694                     | 0.688                       |
| <b>(E)-Cinnamic acid</b>   | 0.033                      | 0.225                   | 0.373                     | 0.021                       | 0.062                         | 0.012                      | 0.021                               | 0.072                        | 0.074                     | 0.170                                  | 0.375                           | 0.012                       | 0.153                          | 0.373                     | 0.037                       |
| <b>Kampferol</b>           | 0.123                      | 0.275                   | 0.288                     | 0.245                       | 0.375                         | 0.278                      | 0.429                               | 0.427                        | 0.018                     | 0.111                                  | 0.713                           | 0.278                       | 0.105                          | 0.288                     | 0.323                       |
| <b>Phloretic acid</b>      | 0.031                      | 0.094                   | 0.249                     | 0.039                       | 0.072                         | 0.109                      | 0.066                               | 0.047                        | 0.194                     | 0.255                                  | 0.181                           | 0.109                       | 0.288                          | 0.249                     | 0.051                       |
| <b>Dihydrocaffeic acid</b> | 0.151                      | 0.194                   | 0.288                     | 0.327                       | 0.481                         | 0.394                      | 0.630                               | 0.646                        | 0.017                     | 0.077                                  | 0.667                           | 0.394                       | 0.074                          | 0.288                     | 0.433                       |
| <b>Dihydroferulic acid</b> | 0.066                      | 0.123                   | 0.393                     | 0.041                       | 0.073                         | 0.066                      | 0.037                               | 0.080                        | 0.493                     | 0.356                                  | 0.240                           | 0.066                       | 0.375                          | 0.393                     | 0.072                       |
| <b>4-ethyl catechol</b>    | 0.777                      | 0.538                   | 0.215                     | 0.929                       | 0.973                         | 0.694                      | 0.791                               | 0.973                        | 0.749                     | 0.394                                  | 0.565                           | 0.694                       | 0.429                          | 0.215                     | 0.630                       |
| <b>Total phenol</b>        | 0.009                      | 0.083                   | 0.357                     | 0.014                       | 0.060                         | 0.002                      | 0.010                               | 0.084                        | 0.037                     | 0.131                                  | 0.069                           | 0.002                       | 0.105                          | 0.357                     | 0.006                       |

**Table S5.** P values corrected by False Discovery Rate (FDR) of the correlations between the top 15 bacterial species identified from 7 to 14 days, and time of fermentation (days), physico-chemical and biochemical composition, and phenolic compounds at the same interval of time.

|                            | <i>Weisse<br/>lla soli</i> | <i>Pedioc<br/>occus<br/>inopin<br/>atus</i> | <i>Pedioc<br/>occus<br/>cellico<br/>la</i> | <i>Pedioc<br/>occus<br/>ethan<br/>olidur<br/>ans</i> | <i>Pedioc<br/>occus<br/>damn<br/>osus</i> | <i>Lactip<br/>lantib<br/>acillus<br/>planta<br/>rum</i> | <i>Comp<br/>anilac<br/>tobacil<br/>lus<br/>futsaii</i> | <i>Secun<br/>dilacto<br/>bacill<br/>us<br/>silagei</i> | <i>Lactic<br/>aseiba<br/>cillus<br/>casei<br/>group</i> | <i>Fructil<br/>actobac<br/>illus<br/>sanfran<br/>ciscensi<br/>s</i> | <i>Lactob<br/>acillus<br/>helvetic<br/>us</i> | <i>Weiss<br/>ella<br/>param<br/>esente<br/>roides</i> | <i>Ligila<br/>ctobac<br/>illus<br/>acidipi<br/>scis</i> | <i>Levilact<br/>obacill<br/>us<br/>hamme<br/>sii</i> | <i>Lentila<br/>ctobacil<br/>lus<br/>parabu<br/>chneri</i> |
|----------------------------|----------------------------|---------------------------------------------|--------------------------------------------|------------------------------------------------------|-------------------------------------------|---------------------------------------------------------|--------------------------------------------------------|--------------------------------------------------------|---------------------------------------------------------|---------------------------------------------------------------------|-----------------------------------------------|-------------------------------------------------------|---------------------------------------------------------|------------------------------------------------------|-----------------------------------------------------------|
| <b>Time (Days)</b>         | 0.2315                     | 0.0005                                      | 0.0003                                     | 0.0003                                               | 0.0003                                    | 0.0011                                                  | 0.0003                                                 | 0.0006                                                 | 0.0001                                                  | 0.0020                                                              | 0.0008                                        | 0.1398                                                | 0.0008                                                  | 0.0039                                               | 0.0001                                                    |
| <b>pH</b>                  | 0.2215                     | 0.0004                                      | 0.0002                                     | 0.0003                                               | 0.0002                                    | 0.0011                                                  | 0.0003                                                 | 0.0006                                                 | 0.0001                                                  | 0.0020                                                              | 0.0008                                        | 0.1398                                                | 0.0008                                                  | 0.0039                                               | 0.0001                                                    |
| <b>TTA</b>                 | 0.2315                     | 0.0005                                      | 0.0003                                     | 0.0003                                               | 0.0003                                    | 0.0011                                                  | 0.0003                                                 | 0.0006                                                 | 0.0001                                                  | 0.0020                                                              | 0.0008                                        | 0.1398                                                | 0.0008                                                  | 0.0039                                               | 0.0001                                                    |
| <b>Citric acid</b>         | 0.6047                     | 0.0258                                      | 0.0374                                     | 0.0146                                               | 0.0258                                    | 0.0397                                                  | 0.0364                                                 | 0.1297                                                 | 0.0325                                                  | 0.0559                                                              | 0.0204                                        | 0.6284                                                | 0.0101                                                  | 0.0130                                               | 0.0078                                                    |
| <b>Lactic acid</b>         | 0.2291                     | 0.0006                                      | 0.0003                                     | 0.0002                                               | 0.0004                                    | 0.0006                                                  | 0.0005                                                 | 0.0005                                                 | 0.0001                                                  | 0.0015                                                              | 0.0007                                        | 0.1356                                                | 0.0007                                                  | 0.0027                                               | 0.0002                                                    |
| <b>Acetic acid</b>         | 0.0101                     | 0.0118                                      | 0.1957                                     | 0.1568                                               | 0.1142                                    | 0.1962                                                  | 0.0101                                                 | 0.2062                                                 | 0.1060                                                  | 0.0213                                                              | 0.1398                                        | 0.0559                                                | 0.0577                                                  | 0.0353                                               | 0.0964                                                    |
| <b>Fructose</b>            | 0.1611                     | 0.0006                                      | 0.0007                                     | 0.0007                                               | 0.0008                                    | 0.0025                                                  | 0.0003                                                 | 0.0025                                                 | 0.0003                                                  | 0.0028                                                              | 0.0011                                        | 0.1750                                                | 0.0014                                                  | 0.0020                                               | 0.0002                                                    |
| <b>Glucose</b>             | 0.2792                     | 0.0003                                      | 0.0005                                     | 0.0002                                               | 0.0003                                    | 0.0010                                                  | 0.0003                                                 | 0.0004                                                 | 0.0001                                                  | 0.0025                                                              | 0.0003                                        | 0.0712                                                | 0.0005                                                  | 0.0070                                               | 0.0001                                                    |
| <b>Mannitol</b>            | 0.0056                     | 0.0030                                      | 0.0263                                     | 0.0268                                               | 0.0125                                    | 0.0676                                                  | 0.0025                                                 | 0.0648                                                 | 0.0204                                                  | 0.0101                                                              | 0.0255                                        | 0.1406                                                | 0.0066                                                  | 0.0008                                               | 0.0095                                                    |
| <b>Chlorogenic acid</b>    | 0.1406                     | 0.0755                                      | 0.1005                                     | 0.1445                                               | 0.0712                                    | 0.6190                                                  | 0.0422                                                 | 0.3657                                                 | 0.1452                                                  | 0.1142                                                              | 0.1047                                        | 0.8450                                                | 0.0708                                                  | 0.0334                                               | 0.0964                                                    |
| <b>Caffeic acid</b>        | 0.6248                     | 0.4146                                      | 0.4111                                     | 0.4502                                               | 0.3199                                    | 0.3132                                                  | 0.5180                                                 | 0.5939                                                 | 0.4582                                                  | 0.3978                                                              | 0.3815                                        | 0.1063                                                | 0.3933                                                  | 0.3978                                               | 0.5160                                                    |
| <b>p-coumaric acid</b>     | 0.4582                     | 0.0054                                      | 0.0066                                     | 0.0066                                               | 0.0089                                    | 0.0130                                                  | 0.0069                                                 | 0.0382                                                 | 0.0075                                                  | 0.0039                                                              | 0.0022                                        | 0.0748                                                | 0.0066                                                  | 0.0100                                               | 0.0228                                                    |
| <b>Vanillin</b>            | 0.1026                     | 0.0254                                      | 0.0884                                     | 0.0677                                               | 0.0768                                    | 0.0964                                                  | 0.0213                                                 | 0.0712                                                 | 0.0317                                                  | 0.0066                                                              | 0.0519                                        | 0.0203                                                | 0.0550                                                  | 0.0353                                               | 0.1306                                                    |
| <b>Ferulic acid</b>        | 0.7290                     | 0.0142                                      | 0.0701                                     | 0.0324                                               | 0.0626                                    | 0.0172                                                  | 0.0519                                                 | 0.0790                                                 | 0.0760                                                  | 0.0687                                                              | 0.0341                                        | 0.0964                                                | 0.0146                                                  | 0.1347                                               | 0.0760                                                    |
| <b>Sinapic acid</b>        | 0.8990                     | 0.3991                                      | 0.4320                                     | 0.3853                                               | 0.4146                                    | 0.0846                                                  | 0.5831                                                 | 0.4725                                                 | 0.5066                                                  | 0.4223                                                              | 0.4104                                        | 0.3222                                                | 0.3579                                                  | 0.4146                                               | 0.4582                                                    |
| <b>(E)-Cinnamic acid</b>   | 0.4146                     | 0.0066                                      | 0.0045                                     | 0.0109                                               | 0.0095                                    | 0.0744                                                  | 0.0037                                                 | 0.0410                                                 | 0.0081                                                  | 0.0334                                                              | 0.0137                                        | 0.5514                                                | 0.0118                                                  | 0.0237                                               | 0.0027                                                    |
| <b>Kamferol</b>            | 0.4687                     | 0.3195                                      | 0.4276                                     | 0.3853                                               | 0.4877                                    | 0.7160                                                  | 0.2658                                                 | 0.7630                                                 | 0.3871                                                  | 0.3222                                                              | 0.3136                                        | 0.7613                                                | 0.3205                                                  | 0.0964                                               | 0.2774                                                    |
| <b>Phloretic acid</b>      | 0.7685                     | 0.0114                                      | 0.0229                                     | 0.0101                                               | 0.0146                                    | 0.0476                                                  | 0.0130                                                 | 0.0790                                                 | 0.0207                                                  | 0.0658                                                              | 0.0137                                        | 0.6076                                                | 0.0070                                                  | 0.0435                                               | 0.0027                                                    |
| <b>Dihydrocaffeic acid</b> | 0.8688                     | 0.4146                                      | 0.4276                                     | 0.2952                                               | 0.4110                                    | 0.7932                                                  | 0.3301                                                 | 0.5427                                                 | 0.2732                                                  | 0.4502                                                              | 0.2446                                        | 0.8941                                                | 0.3275                                                  | 0.3699                                               | 0.2529                                                    |
| <b>Dihydroferulic acid</b> | 0.9929                     | 0.0245                                      | 0.0017                                     | 0.0030                                               | 0.0008                                    | 0.0109                                                  | 0.0258                                                 | 0.0146                                                 | 0.0070                                                  | 0.0505                                                              | 0.0095                                        | 0.4146                                                | 0.0066                                                  | 0.0712                                               | 0.0043                                                    |
| <b>4-ethyl catechol</b>    | 0.5831                     | 0.7613                                      | 0.7145                                     | 0.6441                                               | 0.7579                                    | 0.3978                                                  | 0.7365                                                 | 0.1737                                                 | 0.5180                                                  | 0.7160                                                              | 0.7637                                        | 0.2693                                                | 0.8142                                                  | 0.9452                                               | 0.8528                                                    |
| <b>Total phenol</b>        | 0.4643                     | 0.0063                                      | 0.0007                                     | 0.0012                                               | 0.0023                                    | 0.0296                                                  | 0.0016                                                 | 0.0023                                                 | 0.0006                                                  | 0.0128                                                              | 0.0027                                        | 0.5180                                                | 0.0055                                                  | 0.0178                                               | 0.0012                                                    |



**Table S6.** P values corrected by False Discovery Rate (FDR) of the correlations between all the dominant bacterial species identified throughout the fermentation (from D0 to D42), and time of fermentation (days), physico-chemical and biochemical composition, and phenolic compounds at the same interval of time.

|                            | <i>Levilact<br/>obacillus<br/>brevis</i> | <i>Secundi<br/>lactobac<br/>illus<br/>malefer<br/>mentans</i> | <i>Latilact<br/>obacillus<br/>sakei</i> | <i>Lactoco<br/>ccus<br/>lactis</i> | <i>Leucon<br/>ostoc<br/>carnosu<br/>m</i> | <i>Leucon<br/>ostoc<br/>citreum</i> | <i>Leucon<br/>ostoc<br/>gelidum</i> | <i>Leucon<br/>ostoc<br/>lactis</i> | <i>Leucon<br/>ostoc<br/>mesente<br/>roides</i> | <i>Pediococ<br/>cus<br/>parvulus</i> | <i>Weissella<br/>cibaria</i> | <i>Weissell<br/>a<br/>confusa</i> | <i>Weissell<br/>a<br/>koreensi</i> |
|----------------------------|------------------------------------------|---------------------------------------------------------------|-----------------------------------------|------------------------------------|-------------------------------------------|-------------------------------------|-------------------------------------|------------------------------------|------------------------------------------------|--------------------------------------|------------------------------|-----------------------------------|------------------------------------|
| <b>Time (Days)</b>         | 0.1319                                   | 0.0235                                                        | 0.5686                                  | 0.0015                             | 0.7402                                    | 0.3407                              | 0.1756                              | 0.8153                             | 0.0749                                         | 0.0012                               | 0.1925                       | 0.2381                            | 0.1304                             |
| <b>pH</b>                  | 0.1281                                   | 0.0208                                                        | 0.5466                                  | 0.0032                             | 0.7898                                    | 0.3407                              | 0.1578                              | 0.8595                             | 0.0739                                         | 0.0012                               | 0.1649                       | 0.2105                            | 0.1330                             |
| <b>TTA</b>                 | 0.1319                                   | 0.0235                                                        | 0.5686                                  | 0.0015                             | 0.7402                                    | 0.3407                              | 0.1756                              | 0.8153                             | 0.0749                                         | 0.0012                               | 0.1925                       | 0.2381                            | 0.1304                             |
| <b>Citric acid</b>         | 0.5686                                   | 0.0739                                                        | 0.8508                                  | 0.1330                             | 0.5156                                    | 0.7104                              | 0.9627                              | 0.9627                             | 0.5657                                         | 0.1048                               | 0.7043                       | 0.9627                            | 0.0594                             |
| <b>Lactic acid</b>         | 0.1304                                   | 0.0203                                                        | 0.5341                                  | 0.0012                             | 0.7402                                    | 0.3377                              | 0.1831                              | 0.8608                             | 0.0763                                         | 0.0012                               | 0.2086                       | 0.2381                            | 0.1281                             |
| <b>Acetic acid</b>         | 0.0263                                   | 0.1048                                                        | 0.2749                                  | 0.1460                             | 0.5002                                    | 0.0350                              | 0.2425                              | 0.7835                             | 0.1924                                         | 0.2425                               | 0.2360                       | 0.3143                            | 0.3407                             |
| <b>Fructose</b>            | 0.1909                                   | 0.0263                                                        | 0.5786                                  | 0.0160                             | 0.8468                                    | 0.2749                              | 0.2005                              | 0.9057                             | 0.0822                                         | 0.0032                               | 0.1702                       | 0.2749                            | 0.1048                             |
| <b>Glucose</b>             | 0.1084                                   | 0.0208                                                        | 0.4582                                  | 0.0203                             | 0.7402                                    | 0.4058                              | 0.1509                              | 0.8803                             | 0.0749                                         | 0.0015                               | 0.1319                       | 0.2381                            | 0.1330                             |
| <b>Mannitol</b>            | 0.0776                                   | 0.0036                                                        | 0.3377                                  | 0.1319                             | 0.7092                                    | 0.0235                              | 0.2749                              | 0.9627                             | 0.1319                                         | 0.0594                               | 0.2979                       | 0.4331                            | 0.0749                             |
| <b>Chlorogenic acid</b>    | 0.4582                                   | 0.0739                                                        | 0.8142                                  | 0.3835                             | 0.8608                                    | 0.2749                              | 0.9927                              | 0.2979                             | 0.7835                                         | 0.2105                               | 0.9927                       | 0.8414                            | 0.0263                             |
| <b>Caffeic acid</b>        | 0.3143                                   | 0.3499                                                        | 0.4601                                  | 0.7835                             | 0.7811                                    | 0.7881                              | 0.7143                              | 0.7413                             | 0.8091                                         | 0.5813                               | 0.4582                       | 0.8811                            | 0.7479                             |
| <b>p-coumaric acid</b>     | 0.1319                                   | 0.0235                                                        | 0.4859                                  | 0.2749                             | 0.7306                                    | 0.6187                              | 0.5847                              | 0.9627                             | 0.5147                                         | 0.0350                               | 0.2810                       | 0.7402                            | 0.1122                             |
| <b>Vanillin</b>            | 0.0032                                   | 0.0235                                                        | 0.0724                                  | 0.1048                             | 0.9627                                    | 0.1925                              | 0.3091                              | 0.9669                             | 0.4143                                         | 0.1048                               | 0.2822                       | 0.4551                            | 0.2749                             |
| <b>Ferulic acid</b>        | 0.2105                                   | 0.1460                                                        | 0.7898                                  | 0.5341                             | 0.9101                                    | 0.8414                              | 0.5686                              | 0.6399                             | 0.3377                                         | 0.1509                               | 0.2918                       | 0.5156                            | 0.5248                             |
| <b>Sinapic acid</b>        | 0.7440                                   | 0.7306                                                        | 0.9964                                  | 0.9854                             | 0.8414                                    | 0.9627                              | 0.7402                              | 0.5002                             | 0.5786                                         | 0.6188                               | 0.5466                       | 0.6948                            | 0.9300                             |
| <b>(E)-Cinnamic acid</b>   | 0.3348                                   | 0.0512                                                        | 0.9057                                  | 0.0495                             | 0.6283                                    | 0.5684                              | 0.5125                              | 0.9300                             | 0.2749                                         | 0.0235                               | 0.2749                       | 0.5684                            | 0.1319                             |
| <b>Kampferol</b>           | 0.8899                                   | 0.2515                                                        | 0.9627                                  | 0.4582                             | 0.7104                                    | 0.5686                              | 0.7440                              | 1.0000                             | 0.9669                                         | 0.5403                               | 0.9533                       | 0.6094                            | 0.1122                             |
| <b>Phloretic acid</b>      | 0.5813                                   | 0.1319                                                        | 0.7402                                  | 0.1161                             | 0.4551                                    | 0.8468                              | 0.8360                              | 0.8811                             | 0.4331                                         | 0.0965                               | 0.5466                       | 0.8899                            | 0.1161                             |
| <b>Dihydrocaffeic acid</b> | 0.8556                                   | 0.3143                                                        | 0.9854                                  | 0.4058                             | 0.2295                                    | 0.9627                              | 0.7306                              | 0.5769                             | 0.8468                                         | 0.5156                               | 0.9627                       | 0.5248                            | 0.1702                             |
| <b>Dihydroferulic acid</b> | 0.4143                                   | 0.1084                                                        | 0.9339                                  | 0.1018                             | 0.3377                                    | 0.9669                              | 0.6283                              | 0.5376                             | 0.3780                                         | 0.0173                               | 0.5970                       | 0.7043                            | 0.2105                             |
| <b>4-ethyl catechol</b>    | 0.5403                                   | 0.9778                                                        | 0.2749                                  | 0.5847                             | 0.7835                                    | 0.6892                              | 0.1330                              | 0.9214                             | 0.2425                                         | 0.6845                               | 0.5722                       | 0.1048                            | 0.5847                             |
| <b>Total phenol</b>        | 0.3348                                   | 0.0512                                                        | 0.7765                                  | 0.0012                             | 0.3751                                    | 0.5847                              | 0.4230                              | 0.4230                             | 0.2314                                         | 0.0022                               | 0.5002                       | 0.4941                            | 0.0965                             |

**Figure S1.** Principal component analysis (PCA) (A) of microbial communities based on Euclidean distance, and Principal coordinate analysis (PCoA) (B) based on Bray-Curtis distance matrix during spontaneous fermentation of sauerkraut at 15 °C carried out at 15 °C for 42 days. Samples were taken at the beginning of fermentation (D0), after 0.5 (D0.5), 1 (D1), 2 (D2), 3 (D3), 4 (D4), 5 (D5), 7 (D7), 14 (D14), 21 (D21), 28 (D28), 35 (D35), and 42 (D42) days of fermentation.

A

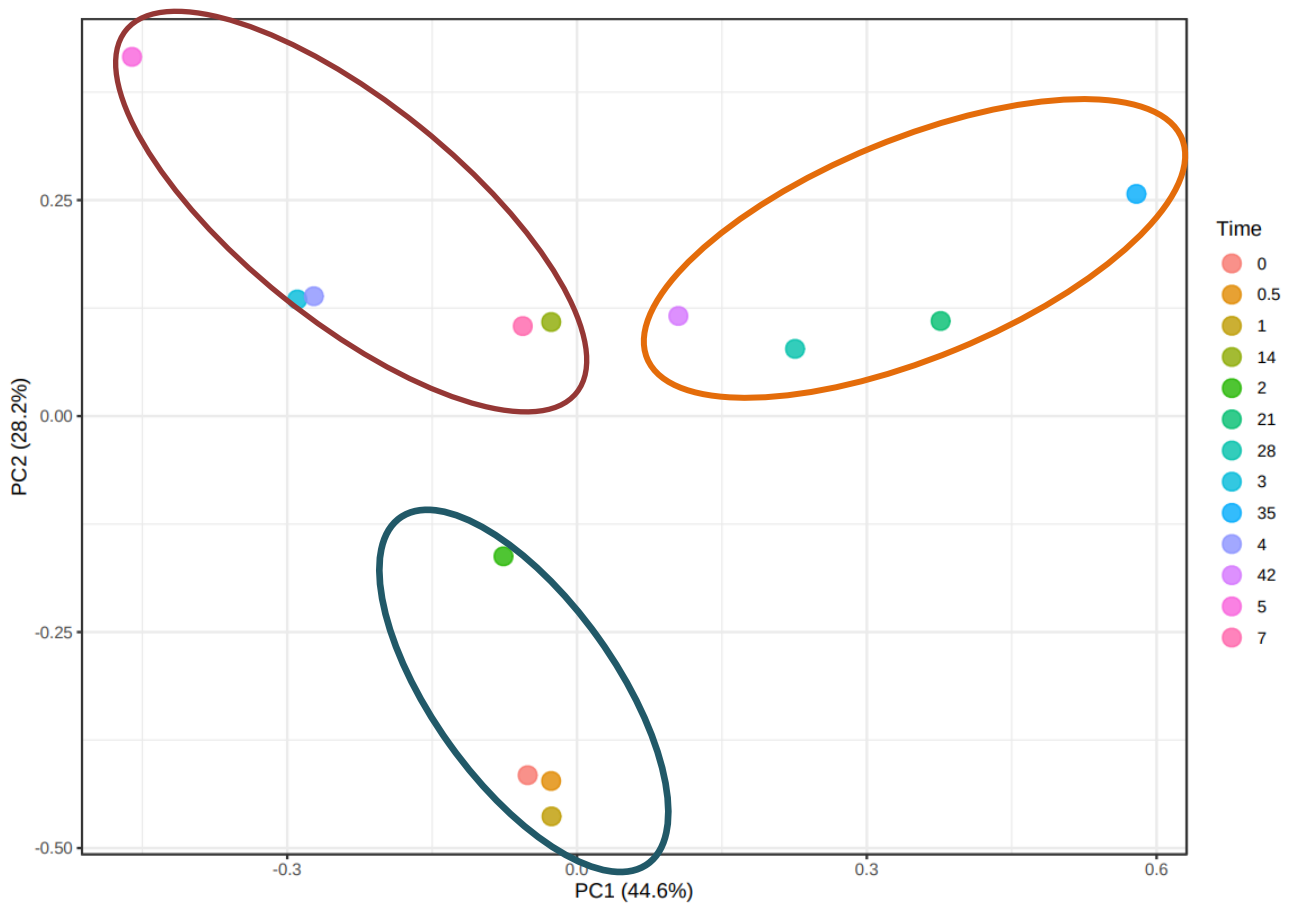

B

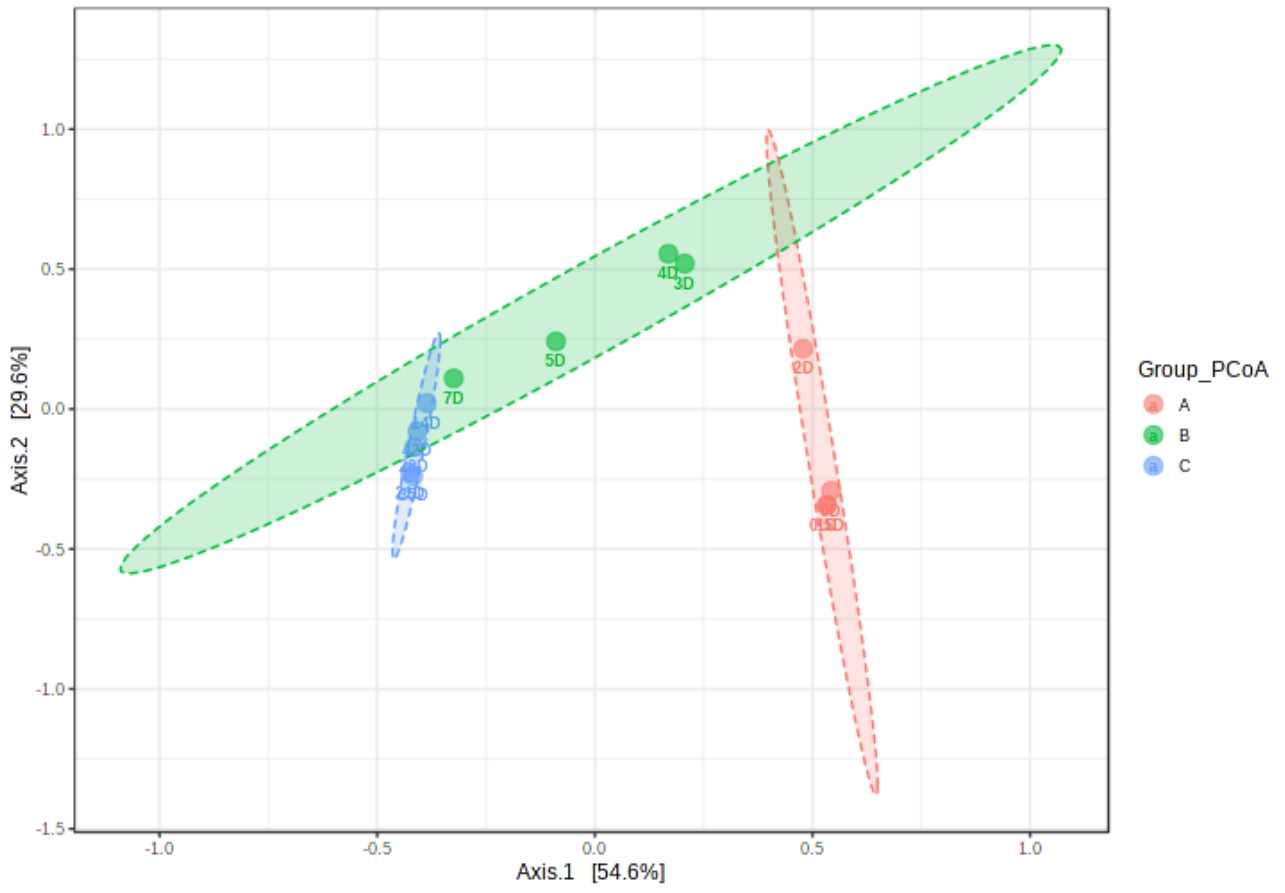





**Figure S3.** Lactic acid bacteria species profile of *vprA* (A) and *padR* (B) genes annotated correlated with phenolic compounds during spontaneous fermentation of sauerkraut at 15 °C at different time points. The colour shows the numbers of coverage genes per species.

A

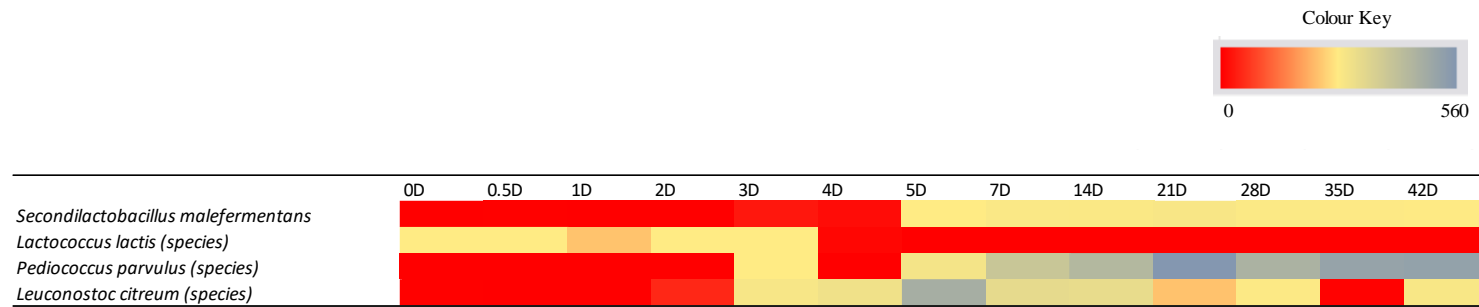

B
